## Outcomes of nonagenarians with acute coronary syndrome

J. Echarte Morales<sup>1</sup>, P.L. Cepas Guillen<sup>2</sup>, G. Caldentey<sup>3</sup>, E. Martinez Gomez<sup>4</sup>, J. Borrego-Rodriguez<sup>1</sup>, P. Vidal<sup>2</sup>, M. Llagostera<sup>3</sup>, A. Viana Tejedor<sup>4</sup>, T. Benito Gonzalez<sup>1</sup>, E. Flores-Umanzor<sup>2</sup>, X. Quiroga<sup>3</sup>, A. Perez De Prado<sup>1</sup>, X. Freixa<sup>2</sup>, M. Sabate<sup>2</sup>, F. Fernandez-Vazquez<sup>1</sup>

<sup>1</sup>Hospital of Leon, Leon, Spain; <sup>2</sup>Hospital Clinic de Barcelona, Barcelona, Spain; <sup>3</sup>Hospital del Mar, Barcelona, Spain; <sup>4</sup>Hospital Clinic San Carlos, Madrid, Spain

**Funding Acknowledgement:** Type of funding source: None

**Background:** Myocardial infarction (MI) in nonagenarians is associated with high morbidity and mortality. Nonetheless, this population has typically been underrepresented in cardiovascular clinical trials.

**Objective:** The aim of this study was to evaluate outcomes of nonagenarian patients presenting with MI who underwent either conservative or invasive management.

**Methods:** We retrospectively included all consecutive patients equal to or older than 90yo admitted with non-ST segment elevation (NSTEMI) or ST segment elevation MI (STEMI) in four tertiary care centers between 2005 and 2018. Patients with type 2 myocardial infarction were excluded. We collected patients' baseline characteristic and procedural data. In-hospital and at 1-year follow-up all-cause mortality and major adverse cardiovascular events were assessed.

**Results:** 523 patients (mean age 92.6±2 years; 60% females) were analyzed. Overall, 184 patients (35.2%) underwent percutaneous coronary intervention (PCI), increasing over the years, mostly in STEMI group (from 16% of patients in 2005 to 75% in 2018). PCI was preferred in those sub-

jects with less prevalence of disability for activities of daily living ( $p<0.01$ ). The use of a radial access (76.6%) and bare metal stents (52.7%) was predominant. No significant differences were found in the incidence of major bleeding events or MI-related mechanical complications between both strategies. During index hospitalization, 99 (18.9%) patients died. Whereas no differences were found in the NSTEMI group ( $p=0.61$ ), a significant lower in-hospital mortality was observed in STEMI group treated with PCI ( $p<0.01$ ). At one-year follow up, 203 (38.8%) patients died, most of them due to a cardiovascular cause (60.6%). PCI was related to a lower all-cause mortality in either NSTEMI ( $p<0.01$ ) or STEMI groups ( $p<0.01$ ) however, lower cardiovascular mortality was only found in STEMI group ( $p=0.03$ ).

**Conclusion:** An invasive approach was performed in over a third of nonagenarian patients, carrying prognostic implications and with a few numbers of complications. PCI seems to be the preferred strategy for STEMI in this high-risk population in spite of age.

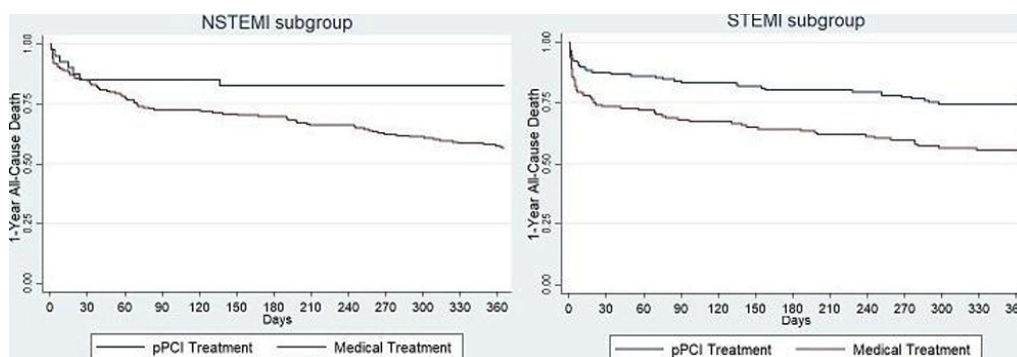

Figure 1
